# Supplementary material
Source: PubMed Central journal article supplement (PMC6752013)
Supplement: AEM.01243-19-s0001.pdf [file AEM.01243-19-s0001.pdf]

**Effects of Methanol on Biomass as Well as Fatty Acid and Carotenoid Biosynthesis in  
*Schizochytrium limacinum* B4D1**

Huanmin Du<sup>1,2,3#</sup>, Xiaoping Liao<sup>2#</sup>, Zhengquan Gao<sup>1#</sup>, Yang Li<sup>2#</sup>, Yu Lei<sup>2</sup>, Wuxi Chen<sup>2</sup>, Limei Chen<sup>2</sup>, Xiang Fan<sup>2</sup>, Ke Zhang<sup>2</sup>, Shulin Chen<sup>2</sup>, Yanhe Ma<sup>2</sup>, Chunxiao Meng<sup>1\*</sup>, Demao Li<sup>2\*</sup>

1 School of Life Sciences, Shandong University of Technology, Zibo, 255049, China.

2 Tianjin Key Laboratory for Industrial Biological Systems and Bioprocessing Engineering, Tianjin Institute of Industrial Biotechnology, Chinese Academy of Sciences, Tianjin, 300308, China.

3 University of Chinese Academy of Sciences, Beijing 100049, China.

# Huanmin Du, Xiaoping Liao, Zhengquan Gao and Yang Li contributed equally to this work.

\* Corresponding authors:

Chunxiao Meng, mengchunxiao@126.com

Demao Li, li\_dm@tib.cas.cn

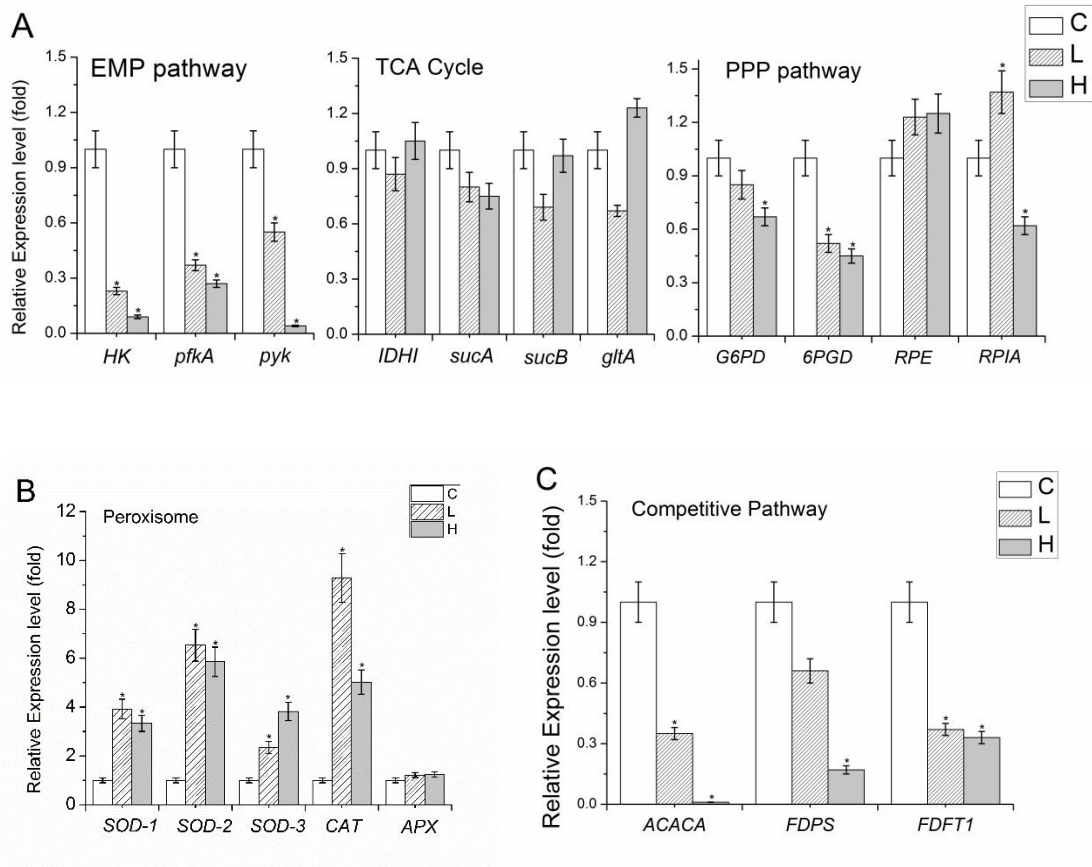

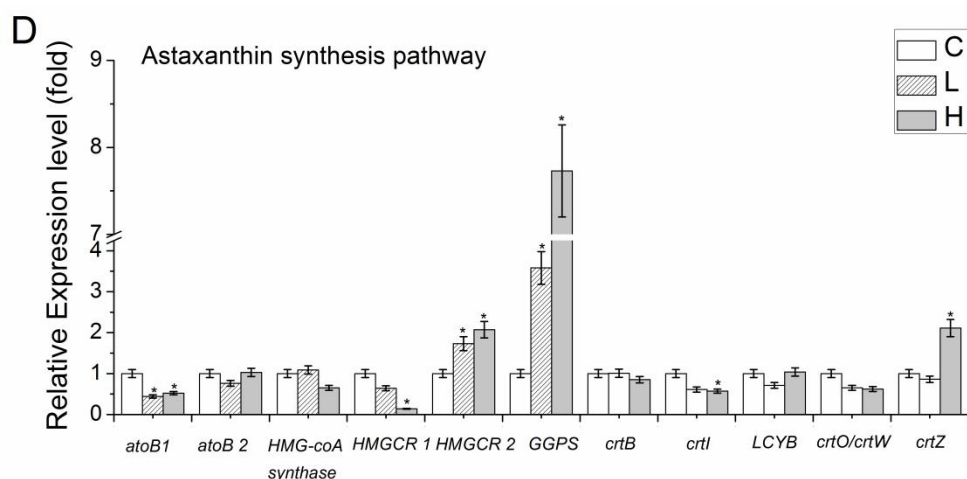

FIG S1 Quantitative Real-time PCR results for genes from the *S. limacinum* B4D1. A: key genes in central carbon metabolism pathways; B: key genes in antioxidant defense system; C: key genes in fatty acid synthesis pathway and squalene/sterols synthesis pathway; C: key genes in carotenoids biosynthesis pathway. Shown are mean values and SEs from three separately grown cultures. The “\*” indicate statistically significant differences compared to controls.

TABLE S1 The genes list mentioned in this paper

| Gene name     | Function                                                 |
|---------------|----------------------------------------------------------|
| <i>HRAS</i>   | GTPase HRas                                              |
| <i>KRAS</i>   | GTPase KRas                                              |
| <i>NRAS</i>   | GTPase NRas                                              |
| <i>MRAS</i>   | GTPase MRas                                              |
| <i>RRAS</i>   | GTPase RRas                                              |
| <i>PLD</i>    | phospholipase D1/2                                       |
| <i>AMPK</i>   | 5'-AMP-activated protein kinase                          |
| <i>SREBP1</i> | sterol regulatory element-binding transcription factor 1 |
| <i>pct</i>    | propionate CoA-transferase                               |
| <i>DLAT</i>   | pyruvate dehydrogenase E2 component                      |
| <i>pta</i>    | phosphate acetyltransferase                              |
| <i>gapA-1</i> | glyceraldehyde 3-phosphate dehydrogenase                 |
| <i>gapA-2</i> |                                                          |
| <i>gapA-3</i> |                                                          |
| <i>HK</i>     | hexokinase                                               |
| <i>pfkA</i>   | 6-phosphofructokinase                                    |
| <i>Pyk-1</i>  | pyruvate kinase                                          |
| <i>Pyk-2</i>  |                                                          |
| <i>Pyk-3</i>  |                                                          |
| <i>Pgk-1</i>  | phosphoglycerate kinase                                  |
| <i>Pgk-2</i>  |                                                          |
| <i>ALDO</i>   | fructose-bisphosphate aldolase                           |
| <i>eno-1</i>  | enolase                                                  |

|                 |                                                              |
|-----------------|--------------------------------------------------------------|
| <i>eno-2</i>    |                                                              |
| <i>tpiA-1</i>   | triosephosphate isomerase (TIM)                              |
| <i>tpiA-2</i>   |                                                              |
| <i>Pgi</i>      | glucose-6-phosphate isomerase                                |
| <i>ADPGK</i>    | ADP-dependent glucokinase                                    |
| <i>gpmI</i>     | 2,3-bisphosphoglycerate-independent phosphoglycerate mase    |
| <i>gpmB</i>     | phosphoglycerate mutase                                      |
| <i>ME-1</i>     | malic enzyme                                                 |
| <i>ME-2</i>     |                                                              |
| <i>IDH3</i>     | isocitrate dehydrogenase                                     |
| <i>IDH1</i>     | isocitrate dehydrogenase (NAD <sup>+</sup> )                 |
| <i>sucA-1</i>   | 2-oxoglutarate dehydrogenase E1 component                    |
| <i>sucA-2</i>   |                                                              |
| <i>sucB-1</i>   | 2-oxoglutarate dehydrogenase E2 component (dihydrolipo amide |
| <i>sucB-2</i>   | succinyltransferase)                                         |
| <i>sucB-3</i>   |                                                              |
| <i>korA</i>     | 2-oxoglutarate ferredoxin oxidoreductase subunit alpha       |
| <i>SDH1</i>     | succinate dehydrogenase (ubiquinone) flavoprotein subunit    |
| <i>SDH3</i>     | succinate dehydrogenase (ubiquinone) cytochrome b560 subunit |
| <i>frdA</i>     | fumarate reductase flavoprotein subunit                      |
| <i>pdhD</i>     | dihydrolipoamide dehydrogenase                               |
| <i>gltA-1</i>   | citrate synthase                                             |
| <i>gltA-2</i>   |                                                              |
| <i>fumC-1</i>   | fumarate hydratase                                           |
| <i>fumC-2</i>   |                                                              |
| <i>acnB</i>     | aconitate hydratase 2 / 2-methylisocitrate dehydratase       |
| <i>LSC2-1</i>   | succinyl-CoA synthetase beta subunit                         |
| <i>LSC2-2</i>   |                                                              |
| <i>G6PD</i>     | Glucose-6-phosphate 1-dehydrogenase                          |
| <i>6PGD</i>     | 6-phosphogluconate dehydrogenase                             |
| <i>RPE</i>      | Ribulose-phosphate 3-epimerase                               |
| <i>RPIA</i>     | Ribose 5-phosphate epimerase                                 |
| <i>SOD-1</i>    | Superoxide dismutase                                         |
| <i>SOD-2</i>    |                                                              |
| <i>SOD-3</i>    |                                                              |
| <i>SOD-4</i>    |                                                              |
| <i>SOD-5</i>    |                                                              |
| <i>SOD-6</i>    |                                                              |
| <i>CAT</i>      | Catalase                                                     |
| <i>APX</i>      | L-ascorbate peroxidase                                       |
| <i>GSH-Px-1</i> | Glutathione peroxidase                                       |
| <i>GSH-Px-2</i> |                                                              |
| <i>GSH-Px-3</i> |                                                              |

|                         |                                                     |
|-------------------------|-----------------------------------------------------|
| <i>ACACA</i>            | acetyl-CoA carboxylase / biotin carboxylase         |
| <i>accC</i>             | acetyl-CoA carboxylase, biotin carboxylase subunit  |
| <i>FASN</i>             | fatty acid synthase, animal type                    |
| <i>accD</i>             | acetyl-CoA carboxylase carboxyl transferase subunit |
| <i>pks-1</i>            | polyketide synthase                                 |
| <i>pks-2</i>            |                                                     |
| <i>FDPS</i>             | farnesyl diphosphate synthase                       |
| <i>FDFT1</i>            | farnesyl-diphosphate farnesyltransferase            |
| <i>AtoB-1</i>           | acetyl-CoA C-acetyltransferase                      |
| <i>AtoB-2</i>           |                                                     |
| <i>AtoB-3</i>           |                                                     |
| <i>AtoB-4</i>           |                                                     |
| <i>AtoB-5</i>           |                                                     |
| <i>HMG-CoA synthase</i> | hydroxymethylglutaryl-CoA synthase                  |
| <i>HMGCR-1</i>          | hydroxymethylglutaryl-CoA reductas                  |
| <i>HMGCR-2</i>          |                                                     |
| <i>GGPS</i>             | geranylgeranyl diphosphate synthase                 |
| <i>crtB</i>             | 15-cis-phytoene synthase                            |
| <i>crtI</i>             | phytoene desaturase                                 |
| <i>LCYB</i>             | lycopene beta-cyclase                               |
| <i>crtO/crtW</i>        | beta-carotene ketolase                              |
| <i>crtZ</i>             | beta-carotene 3-hydroxylase                         |

TABLE S2 Expression of key genes related to central carbon metabolism.

| Pathway | Gene name     | FPKM    |         |        | $\log_2(L/C)$ | $\log_2(H/C)$ | $\log_2(H/L)$ |
|---------|---------------|---------|---------|--------|---------------|---------------|---------------|
|         |               | C       | L       | H      |               |               |               |
| EMP     | <i>gapA-1</i> | 5364.28 | 2208.31 | 724.52 | -1.28         | -2.89         | -1.61         |
|         | <i>gapA-2</i> | 3432.6  | 1763.39 | 595.88 | -0.96         | -2.53         | -1.57         |
|         | <i>gapA-3</i> | 198.13  | 195.57  | 39.07  | -0.02         | -2.34         | -2.32         |
|         | <i>HK</i>     | 466.13  | 146.33  | 64.59  | -1.67         | -2.85         | -1.18         |
|         | <i>pfkA</i>   | 510.83  | 305.36  | 155.97 | -0.74         | -1.71         | -0.97         |
|         | <i>Pyk-1</i>  | 1727.62 | 852.57  | 132.91 | -1.02         | -3.70         | -2.68         |
|         | <i>Pyk-2</i>  | 213.76  | 147.27  | 113.6  | -0.54         | -0.91         | -0.37         |

|               |               |         |         |         |       |       |       |
|---------------|---------------|---------|---------|---------|-------|-------|-------|
|               | <i>Pyk-3</i>  | 2.03    | 3.58    | 13.89   | 0.82  | 2.77  | 1.96  |
|               | <i>Pgk-1</i>  | 949.57  | 732.28  | 573.64  | -0.37 | -0.73 | -0.35 |
|               | <i>Pgk-2</i>  | 616.58  | 444.15  | 264.97  | -0.47 | -1.22 | -0.75 |
|               | <i>ALDO</i>   | 8790.6  | 2690.33 | 743.3   | -1.71 | -3.56 | -1.86 |
|               | <i>eno-1</i>  | 2784.57 | 1388.27 | 555.09  | -1.00 | -2.33 | -1.32 |
|               | <i>eno-2</i>  | 54.52   | 45.74   | 107.5   | -0.25 | 0.98  | 1.23  |
|               | <i>tpiA-1</i> | 2192.19 | 688.27  | 284.28  | -1.67 | -2.95 | -1.28 |
|               | <i>tpiA-2</i> | 1425.02 | 721.24  | 220.65  | -0.98 | -2.69 | -1.71 |
|               | <i>Pgi</i>    | 399.59  | 274.67  | 51.96   | -0.54 | -2.94 | -2.40 |
|               | <i>ADPGK</i>  | 12.11   | 17.58   | 21.05   | 0.54  | 0.80  | 0.26  |
|               | <i>gpmI</i>   | 707.81  | 453.16  | 317.82  | -0.64 | -1.16 | -0.51 |
|               | <i>gpmB</i>   | 43.37   | 75.22   | 198.53  | 0.79  | 2.19  | 1.40  |
| TCA           | <i>ME-1</i>   | 1348.18 | 1312.64 | 692.66  | -0.04 | -0.96 | -0.92 |
|               | <i>ME-2</i>   | 722.9   | 633.33  | 269.43  | -0.19 | -1.42 | -1.23 |
|               | <i>IDH3</i>   | 399.6   | 351.85  | 846.6   | -0.18 | 1.08  | 1.27  |
|               | <i>IDH1</i>   | 17.36   | 19.13   | 26.46   | 0.14  | 0.61  | 0.47  |
|               | <i>sucA-1</i> | 347.428 | 282.597 | 302.563 | -0.30 | -0.20 | 0.10  |
|               | <i>sucA-2</i> | 11.4292 | 10.3657 | 41.8307 | -0.14 | 1.87  | 2.01  |
|               | <i>sucB-1</i> | 311.746 | 249.941 | 318.765 | -0.32 | 0.03  | 0.35  |
|               | <i>sucB-2</i> | 296.327 | 116.768 | 222.555 | -1.34 | -0.41 | 0.93  |
|               | <i>sucB-3</i> | 65.0034 | 66.3826 | 65.1986 | 0.03  | 0.00  | -0.03 |
|               | <i>korA</i>   | 18.15   | 8.31    | 5.56    | -1.13 | -1.71 | -0.58 |
|               | <i>SDH1</i>   | 464.96  | 318.59  | 260.16  | -0.55 | -0.84 | -0.29 |
|               | <i>SDH3</i>   | 1036.45 | 888.34  | 426.31  | -0.22 | -1.28 | -1.06 |
|               | <i>frdA</i>   | 10.14   | 18.11   | 24.41   | 0.84  | 1.27  | 0.43  |
|               | <i>pdhD</i>   | 901.51  | 470.66  | 382.27  | -0.94 | -1.24 | -0.30 |
|               | <i>gltA-1</i> | 995.39  | 811.542 | 1133.61 | -0.29 | 0.19  | 0.48  |
|               | <i>gltA-2</i> | 29.0187 | 31.0607 | 39.8868 | 0.10  | 0.46  | 0.36  |
|               | <i>fumC-1</i> | 178.37  | 170.15  | 289.56  | -0.07 | 0.70  | 0.77  |
|               | <i>fumC-2</i> | 6.77    | 9.71    | 11.61   | 0.52  | 0.78  | 0.26  |
|               | <i>acnB</i>   | 1246.08 | 1178.33 | 522.3   | -0.08 | -1.25 | -1.17 |
|               | <i>LSC2-1</i> | 349.19  | 471.54  | 434.78  | 0.43  | 0.32  | -0.12 |
| <i>LSC2-2</i> | 119.06        | 66.32   | 272.7   | -0.84   | 1.20  | 2.04  |       |
| PPP           | <i>G6PD</i>   | 297.151 | 255.485 | 198.068 | -0.36 | -0.22 | -0.58 |
|               | <i>6PGD</i>   | 993.297 | 466.975 | 385.978 | -0.27 | -1.09 | -1.36 |
|               | <i>RPE</i>    | 94.9946 | 109.717 | 115.308 | 0.07  | 0.20  | 0.28  |
|               | <i>RPIA</i>   | 68.0836 | 105.278 | 39.6767 | -1.40 | 0.63  | -0.79 |

TABLE S3 Expression of key genes related to antioxidant defense system

| Gene name    | FPKM    |         |         | $\log_2(L/C)$ | $\log_2(H/C)$ | $\log_2(H/L)$ |
|--------------|---------|---------|---------|---------------|---------------|---------------|
|              | C       | L       | H       |               |               |               |
| <i>SOD-1</i> | 561.68  | 2126.22 | 1823.49 | 1.92          | 1.7           | -0.22         |
| <i>SOD-2</i> | 96.9404 | 645.232 | 561.171 | 2.74          | 2.53          | -0.2          |

|                 |         |         |         |       |       |       |
|-----------------|---------|---------|---------|-------|-------|-------|
| <i>SOD-3</i>    | 149.988 | 376.907 | 561.995 | 1.33  | 1.91  | 0.58  |
| <i>SOD-4</i>    | 200.164 | 213.846 | 243.229 | 0.10  | 0.28  | 0.19  |
| <i>SOD-5</i>    | 50.2632 | 67.5072 | 46.3508 | 0.42  | -0.12 | -0.54 |
| <i>SOD-6</i>    | 49.1659 | 36.6054 | 46.9436 | -0.43 | -0.07 | 0.36  |
| <i>CAT</i>      | 54.4367 | 509.177 | 269.323 | 3.22  | 2.31  | -0.92 |
| <i>APX</i>      | 179.364 | 226.395 | 216.565 | 0.33  | 0.28  | -0.06 |
| <i>GSH-Px-1</i> | 99.6278 | 115.014 | 93.4697 | 0.2   | -0.09 | -0.3  |
| <i>GSH-Px-2</i> | 194.68  | 143.276 | 60.8679 | -0.45 | -1.69 | -1.25 |
| <i>GSH-Px-3</i> | 510.021 | 336.96  | 203.983 | -0.6  | -1.32 | -0.71 |

TABLE S4 Expression of key genes related to two competitive pathways

| Gene name    | FPKM    |        |       | $\log_2(L/C)$ | $\log_2(H/C)$ | $\log_2(H/L)$ |
|--------------|---------|--------|-------|---------------|---------------|---------------|
|              | C       | L      | H     |               |               |               |
| <i>ACACA</i> | 1032.18 | 489.24 | 10.14 | -1.08         | -6.67         | -5.59         |
| <i>accC</i>  | 39.81   | 13.94  | 21.86 | -1.51         | -0.87         | 0.65          |
| <i>FASN</i>  | 24.13   | 34.49  | 0     | 0.52          | -             | -             |
| <i>accD</i>  | 11.19   | 3.02   | 1.09  | -1.89         | -3.36         | -1.47         |
| <i>pks-1</i> | 895.78  | 532.16 | 6.4   | -0.75         | -7.13         | -6.38         |
| <i>pks-2</i> | 561.03  | 278.54 | 21.08 | -1.01         | -4.73         | -3.72         |
| <i>FDPS</i>  | 282.29  | 182.21 | 56.31 | -0.63         | -2.33         | -1.69         |
| <i>FDFT1</i> | 100.37  | 88.73  | 29.42 | -0.18         | -1.77         | -1.59         |

TABLE S5 Expression of key genes related to carotenoid pathway analysis

| Gene name               | FPKM   |        |        | $\log_2(L/C)$ | $\log_2(H/C)$ | $\log_2(H/L)$ |
|-------------------------|--------|--------|--------|---------------|---------------|---------------|
|                         | C      | L      | H      |               |               |               |
| <i>AtoB-1</i>           | 158.86 | 176.04 | 144.77 | 0.15          | -0.13         | -0.28         |
| <i>AtoB-2</i>           | 134.06 | 136.80 | 81.04  | 0.03          | -0.73         | -0.76         |
| <i>AtoB-3</i>           | 25.22  | 31.64  | 24.01  | 0.33          | -0.07         | -0.40         |
| <i>AtoB-4</i>           | 5.24   | 8.00   | 37.95  | 0.61          | 2.85          | 2.25          |
| <i>AtoB-5</i>           | 2.19   | 0.49   | 1.76   | -2.17         | -0.32         | 1.85          |
| <i>HMG-CoA synthase</i> | 127.80 | 197.97 | 92.27  | 0.63          | -0.47         | -1.10         |
| <i>HMGCR-1</i>          | 511.66 | 219.34 | 49.56  | -1.22         | -3.37         | -2.15         |
| <i>HMGCR-2</i>          | 57.40  | 96.16  | 111.41 | 0.74          | 0.96          | 0.21          |
| <i>GGPS</i>             | 37.82  | 98.54  | 241.32 | 1.38          | 2.67          | 1.29          |
| <i>crtB</i>             | 43.26  | 43.83  | 37.57  | 0.02          | -0.20         | -0.22         |

|                  |        |        |        |       |       |       |
|------------------|--------|--------|--------|-------|-------|-------|
| <i>crtI</i>      | 16.91  | 10.84  | 7.26   | -0.64 | -1.22 | -0.58 |
| <i>LCYB</i>      | 128.34 | 129.03 | 153.08 | -0.22 | -1.56 | -1.34 |
| <i>crtO/crtW</i> | 27.87  | 27.52  | 18.70  | -0.02 | -0.58 | -0.56 |
| <i>crtZ</i>      | 8.93   | 13.11  | 21.72  | 0.55  | 1.28  | 0.73  |
